# Supplementary material
Source: PubMed Central journal article supplement (PMC7315428)
Supplement: ao0c00522_si_001.pdf [file ao0c00522_si_001.pdf]

# Protein binding pocket optimization for virtual high-throughput screening (vHTS) drug discovery

## Supporting Information

Dimitris Gazgalis<sup>1</sup>, Mehreen Zaka<sup>1,2</sup>, Bilal Haider Abbasi<sup>2</sup>, Diomedes E. Logothetis<sup>1</sup>, Mihaly Mezei<sup>3</sup>, Meng Cui<sup>1\*</sup>

<sup>1</sup>Department of Pharmaceutical Sciences, Northeastern University School of Pharmacy, Boston, Massachusetts, 02115, USA

<sup>2</sup>Department of Biotechnology, Quaid-i-Azam University, Islamabad, Pakistan

<sup>3</sup>Department of Pharmacological Sciences, Icahn School of Medicine at Mount Sinai, New York, NY 10029, USA

\*Correspondence should be addressed to M.C. ([m.cui@northeastern.edu](mailto:m.cui@northeastern.edu))

**Running title:** Binding pocket optimization by Monte Carlo

## Supplemental 1

### *Torsional angle sampling input*

```
FILE Protein
TITL Protein for torsional angle sampling
TITL Solute molecules move, swap and torsions
HRDW VC32      ! 32-bit vector
SVVC SPCC 13.00 ! Solvent cutoff
SUVC SPGC 13.0  ! MI on the solute
SUUC SPGC 17.0  ! Molec-based MI for intrasolute
PBCN HEXG 99.00 99.00 99.00 !hexagonal PBC
TEMP 998
NSLV 0 ! Only solute
STEP 0.00 00.0 0.55 40.0 10
SVPT TIP3 TIP3 ! Solvent-solvent pot: CHARMM
SUPT CHRM
SETC DIEL 2.0
SLTA SMPL MMC FILE (N) ! (N) is the number of atoms
PRMF CHRM par_all22_prot_na.inp
!Torsion pot param file
PART UNIF RAND RAND 1.0
!Torsion strategy and frequency
TORD INPT (N) !Definiton of active torsions where (N) is the number of torsions
... !Definitions of cative torsions from mcs file
CNFG RANI ASCI
!SWAP 0.2 !Specify swapping frequency
TRAJ CHRM
RUNS 1000000 100 20000 1000 5000
STOP SLFT
```

## Supplemental 2

*Pocket size calculation input*

```
FILE Protein
PRNT ECHO
HRDW VC32          ! 32-bit vector
SVVC SPCC 9.05     ! Solvent cutoff
SUVV MIGC 0.0      ! MI on the solute
PBCN RECT 76.0 91.0 91.0 !Rectangular PBC
MOVE RAND          ! Random selections
TEMP 298
NSLV 000
STEP 0.00 00.0 0.55 40.0 60
! slt, slv stepsize, slt move freq.
SVPT TIP3 TIP3
SUPT CHRM
SAMP METC 0.5
MOLD 1 (N)         !Where (N) is the number of atoms
PFRD CHRM toppar/par_all36_prot.prm
SLTA SMPL MMC FILE (N) !Where (N) is the number of atoms
GCEN CAVB RSIG ALTI
  1.0 2.5 1000.0 250 250 250 1000 1 1 0010000 50000
CNFG READ PDB
PRTG PDB ALLG AGLS 1 0 0.6
STOP
```
